# Supplementary material
Source: Research Square preprint supplement (doi:10.21203/rs.3.rs-10019641/v1)
Supplement: Supplementary file 2 [file a89dbbdb9fa242f29cebef9f.docx]

**Supplementary Methods**

Section 1 - **Ophthalmic Imaging Protocol**
Section 2 - **Image Processing and Quantification**

Section 3 - **Stratification by Timing of Repair**
Section 4 - **References**

**Abbreviations**

AoCo, aortic coarctation;
ART, automatic real-time averaging;
BP, blood pressure;
CLAHE, contrast-limited adaptive histogram equalization;
CVI, choroidal vascularity index;
DBP, diastolic blood pressure;
EDI, enhanced depth imaging;
FD, fractal dimension;
HR, high resolution;
IOP, intraocular pressure;
IR, infrared;
LVH, left ventricular hypertrophy;
OCT, optical coherence tomography;
OCTA, optical coherence tomography angiography;
RNFL, retinal nerve fiber layer;
SBP, systolic blood pressure;
SCP, superficial capillary plexus;
TVL, total vessel length;
VD, vessel density;
VLD, vessel length density.

**Section 1. Ophthalmic Imaging Protocol**

### All imaging was performed using the Spectralis SD-OCT system with the OCTA module (Heidelberg Engineering, Germany). Two experienced and masked examiners (Examiner 1 and Examiner 2) acquired macular OCT and OCT angiography (OCTA) scans in each participant's right eye.

### Structural OCT scans were obtained using the FAST macular volume protocol with Enhanced Depth Imaging (EDI) mode in High Resolution (HR). This protocol consisted of 25 horizontal B-scans covering a 6 × 6 mm area centered on the fovea, with ART 9 averaging per B-scan to reduce noise and enhance image quality. EDI mode was used to optimize visualization of the choroid–sclera interface, enabling quantification of choroidal thickness and choroidal vascularity index (CVI).

### OCTA was conducted using an 870 nm wavelength and an acquisition speed of 40,000 A-scans per second. Each scan covered a 3 × 3 mm area centered on the fovea, with a sampling density of 512 A-scans per B-scan and 512 B-scans, and an interscan spacing of 11 µm.

For tortuosity analysis, high-resolution infrared reflectance images were extracted from both the RNFL protocol and the macular structural OCT protocol without EDI. These *en face* IR images were exported and analyzed using a custom artificial intelligence pipeline for automated quantification of retinal vascular tortuosity.

Two investigators (Examiner 1 and Examiner 2) independently reviewed all scans to ensure quality. Images with motion artifacts, segmentation errors, fixation losses, or a signal strength index below 7 were excluded. All image processing steps were performed by masked graders to ensure reproducibility and minimize bias.

**Section 2. Image Processing and Quantification**

OCTA images were exported and processed using ImageJ (National Institutes of Health, USA) for binarization and quantification of vascular area. Vascular morphology was further analyzed using the OCTAVA open-source toolbox[1,2], which extracted vessel density (VD), vessel length density (VLD), total vessel length (TVL), vessel diameter, fractal dimension (FD), and vascular tortuosity. The Frangi filter was applied with a maximum kernel size of 4 pixels and a twig size of 8 pixels, as previously validated[1]. To quantify vascular tortuosity, we applied a filtering strategy by setting a minimum branch length (twig size) of 30 pixels (~200 µm), which allowed for the exclusion of very short capillary segments and reduced the influence of segmentation noise. To account for axial length–related magnification effects, individual correction factors were applied based on Bennett’s formula[3].

The choroidal vascularity index (CVI) was calculated from horizontal enhanced depth imaging (EDI) OCT B-scans passing through the fovea. Each image was binarized using the Niblack local thresholding method after brightness adjustment, and the choroid was manually segmented between the retinal pigment epithelium and the choroid–sclera interface. The total choroidal area and luminal area were quantified, and CVI was computed as luminal area / total choroidal area[4].

Retinal vascular tortuosity was also assessed in infrared fundus images using a deep learning classifier based on the Xception architecture. Images were preprocessed with green channel inversion, background normalization, and contrast enhancement (CLAHE), and resized via cropping or padding. The model was trained using five-fold stratified cross-validation to classify tortuosity into three grades (none, mild, high), without prior vessel segmentation[5].

**Section 3 - Stratification by Timing of Repair**

To explore the potential impact of intervention timing on retinal microvasculature, patients with AoCo were further stratified into perinatal (repair performed within the first 28 days of life) and late repair subgroups, based on age at initial surgical correction (*Idade1_proc*). This variable was used to generate a categorical variable (*g3_peri*), with three levels:

- 0 = controls
- 1 = AoCo with repair after 28 days (late repair)
- 2 = AoCo with repair ≤ 28 days (perinatal repair)

We then compared retinal vessel density (SCP VD) and vascular tortuosity across the three groups. To investigate whether vascular changes were associated with overall cardiovascular severity, we tested group differences in key markers of cardiovascular burden—namely hypertension, residual gradient, left ventricular hypertrophy (LVH), non-dipping blood pressure pattern, systolic load >25%, and hypertensive response to exercise—using chi-square tests. A composite burden score was also calculated by assigning one point for the presence of each marker (range 0–6), and compared between groups using Kruskal–Wallis tests. This stratification was used exclusively for exploratory analyses presented in the Supplementary Results.

**Section 4- Bibliography**

[1] Untracht GR, Durkee MS, Zhao M, Kwok-Cheung Lam A, Sikorski BL, Sarunic M V., et al. Towards standardising retinal OCT angiography image analysis with open-source toolbox OCTAVA. Sci Rep 2024;14. https://doi.org/10.1038/s41598-024-53501-6.

[2] Untracht GR, Matos RS, Dikaios N, Bapir M, Durrani AK, Butsabong T, et al. OCTAVA: An open-source toolbox for quantitative analysis of optical coherence tomography angiography images. PLoS One 2021;16. https://doi.org/10.1371/journal.pone.0261052.

[3] Bennett AG, Rudnicka AR, Edgar DF. Improvements on Littmann’s method of determining the size of retinal features by fundus photography. Graefes Archive for Clinical and Experimental Ophthalmology 1994;232:361–7.

[4] Flores R, Carneiro Â, Neri G, Fradinho AC, Quenderra B, Barata MJ, et al. Choroidal Vascular Impairment in Intermediate Age-Related Macular Degeneration. Diagnostics 2022;12. https://doi.org/10.3390/diagnostics12051290.

[5] Sousa H. Characterization and Assessment of Vessel Tortuosity . Faculty of Engineering of the University of Porto, 2024.
